# Supplementary material
Source: PubMed Central journal article supplement (PMC3213755)

Supporting information for

Light-Initiated Hydroxylation of Lauric Acid Using Hybrid P450 BM3 Enzymes

Ngoc-Han Tran, Ngoc Huynh, Thuba Bui, Yen Nguyen, Phuong Huynh, Mary E. Cooper  
and Lionel E. Cheruzel\*<sup>a</sup>

<sup>a</sup>San José State University, Department of Chemistry, One Washington Square, San José, CA 95192-0101.

Fig. S1: FPLC chromatogram showing the separation of Ru-Q397C-BM3 and Q397C-BM3 proteins after labeling reaction using stepwise elution gradient (Solvent A: 10 mM Tris pH = 8.0, Solvent B: 10 mM Tris, 300 mM NaCl, HiTrap Q column).

Fig. S2: Mass Spectra of the Q397C-BM3 mutant (blue) and the Ru-Q397C-BM3 (red) displaying a mass increase of 646, indication of the covalent attachment of the Ru(II) photosensitizer to BM3 mutants.

Fig. S3: UV-Vis spectra of the Q397C-BM3 mutant (blue), Ru-Q397C-BM3 (red) and Ru(II) photosensitizer (green) at the same concentration of 3  $\mu$ M.

Fig. S4: Steady state emission quenching of the Ru(II)-Q397C-BM3 with increased concentration of the reductive quencher DTC ( $\lambda_{\text{ex}} = 455$  nm).

Fig. S5: Representative curves showing formation of products over time for the Ru-Q397C-BM3 mutants (3  $\mu$ M) with 0.1, 0.5 and 1 mM lauric acid concentrations under constant light irradiation.

Fig. S6: Lineweaver-Burk plot for the Ru-Q397C-BM3 and Ru-K97C-BM3 hybrid enzymes.

Table S1: Initial rates of reaction for the different enzymatic systems determined in triplicates after one-minute reaction with 1.5 mM lauric acid.

Fig. S7: Difference spectrum for the BM3-WT and Ru-BM3 enzymes in the presence of CO under photoreductive conditions (100 mM DTC and constant light irradiation from a mercury lamp with UV- and IR-cutoff filters).

Fig. S8: Absorption spectra showing the Ru-Q397C-BM3 protein decay over the course of the reaction (dashed lines) and with 10  $\mu$ M catalase (solid lines). Inset: Single exponential fit of the protein decay (rate = 0.02  $\text{min}^{-1}$  with 10  $\mu$ M catalase).

Fig. S9: Representative curves showing formation of products over time with 3  $\mu$ M BM3-WT and 10 mM H<sub>2</sub>O<sub>2</sub> (black), 3  $\mu$ M Ru-Q397C-BM3 and 10 mM H<sub>2</sub>O<sub>2</sub> (red) and 100 mM DTC + light (blue).

Fig. S1:

FPLC chromatogram showing the separation of Ru-Q397C-BM3 and Q397C-BM3 proteins after labeling reaction using stepwise elution gradient (Solvent A: 10 mM Tris pH = 8.0; Solvent B: 10 mM Tris, 300 mM NaCl; HiTrap Q column).

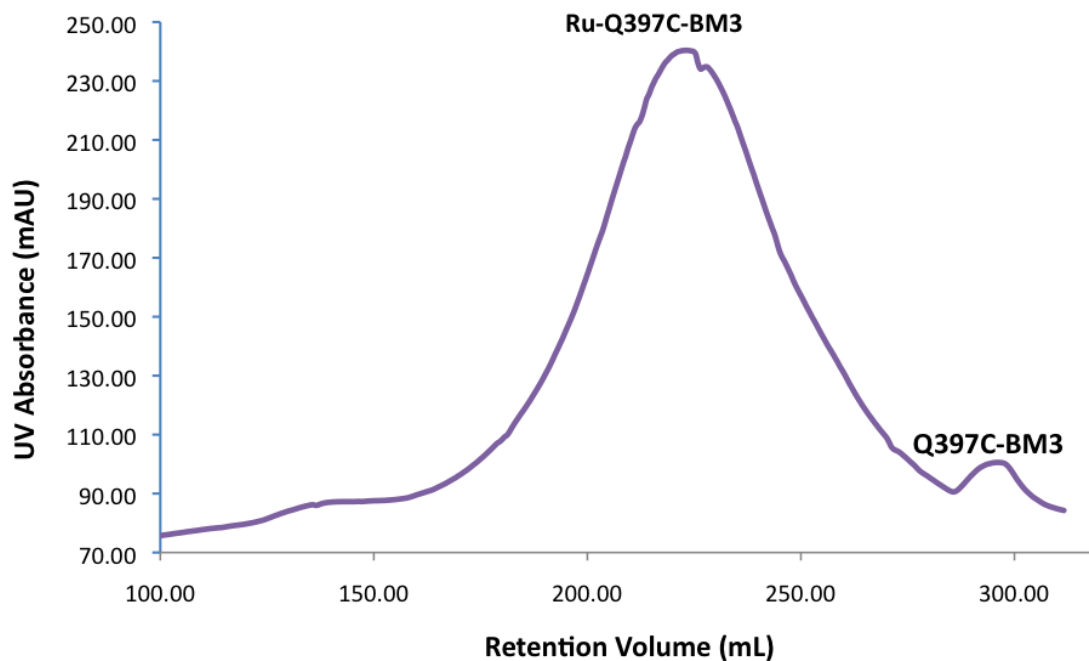

Fig. S2:

Mass Spectra of the Q397C-BM3 mutant (blue) and the Ru-Q397C-BM3 (red) displaying a mass increase of 646, indication of the covalent attachment of the Ru(II) photosensitizer to BM3 mutants.

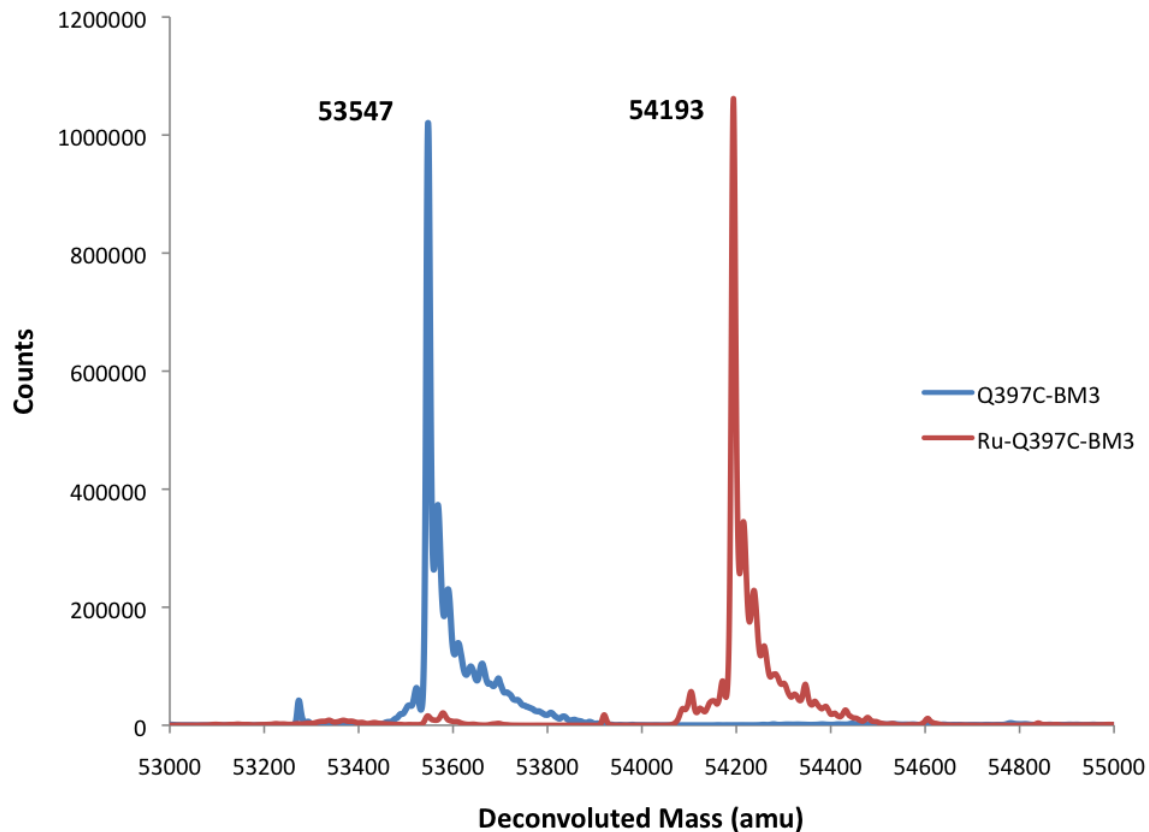

Fig. S3:

UV-Vis spectra of the Q397C-BM3 mutant (blue), Ru-Q397C-BM3 (red) and Ru(II) photosensitizer (green) at the same concentration of 3  $\mu\text{M}$ .

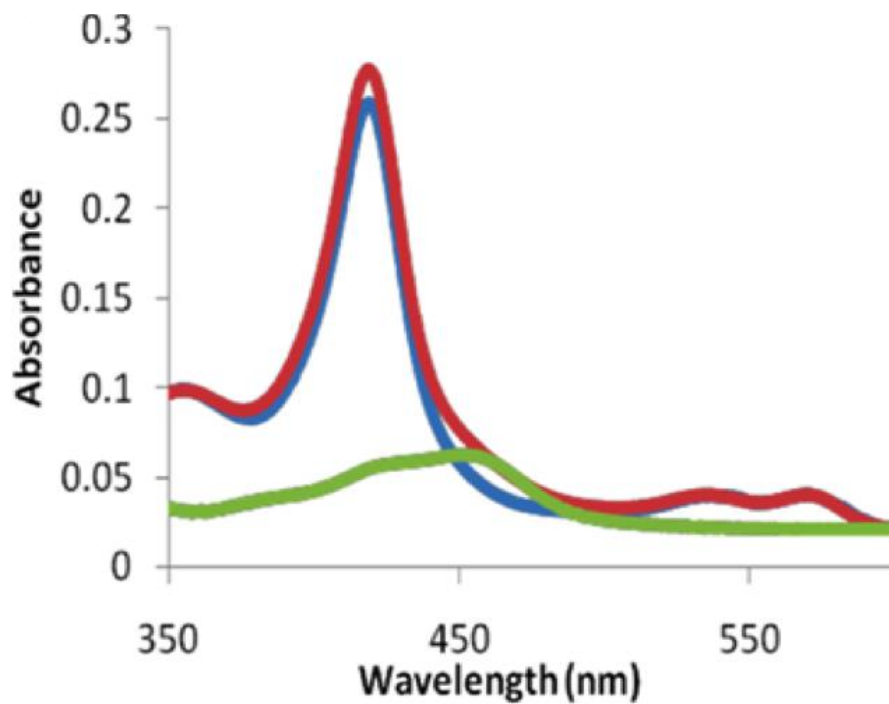

Fig. S4:

Steady state emission quenching of the Ru(II)-Q397C-BM3 with increased concentration of the reductive quencher DTC ( $\lambda_{\text{ex}} = 455 \text{ nm}$ ).

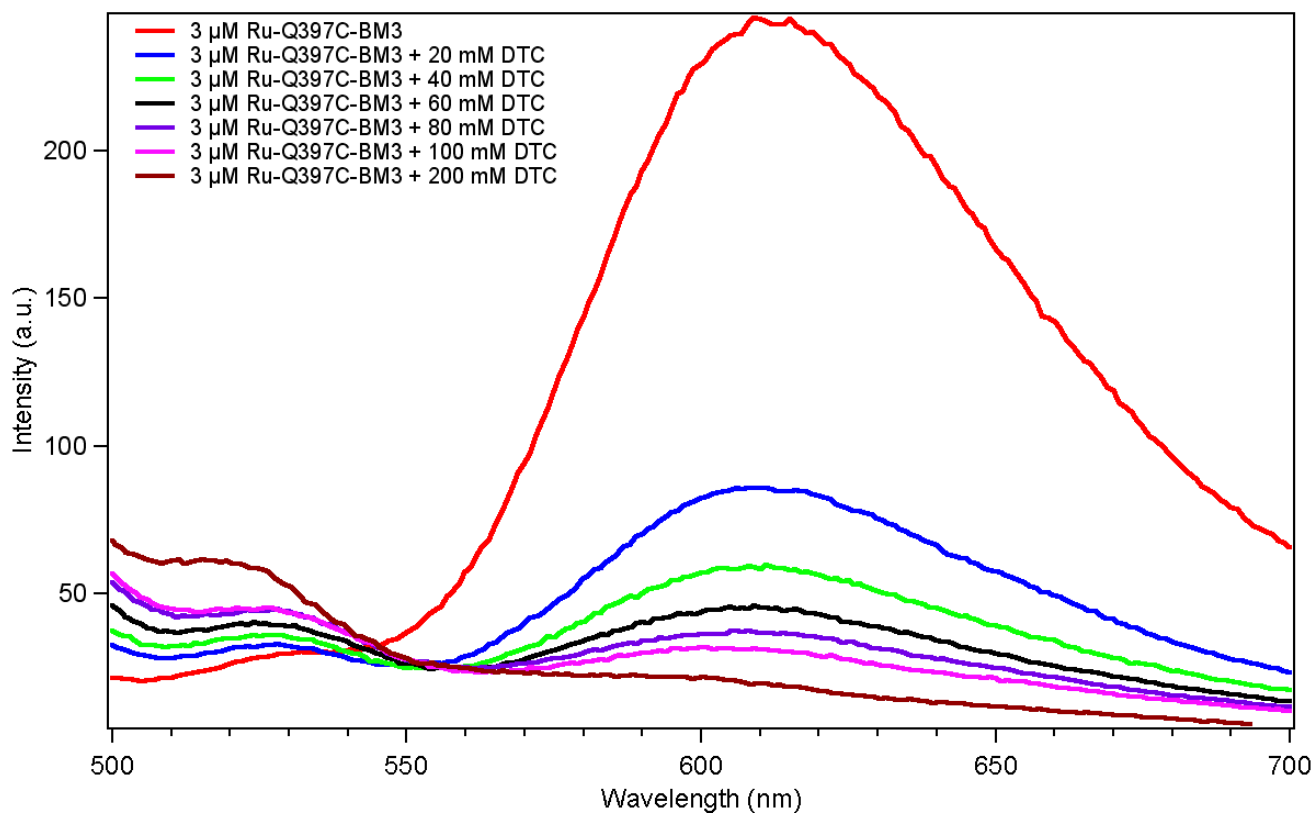

Fig. S5:

Representative curves showing formation of products over time for the Ru-Q397C-BM3 mutants (3  $\mu$ M) with 0.1, 0.5 and 1 mM lauric acid concentrations under constant light irradiation.

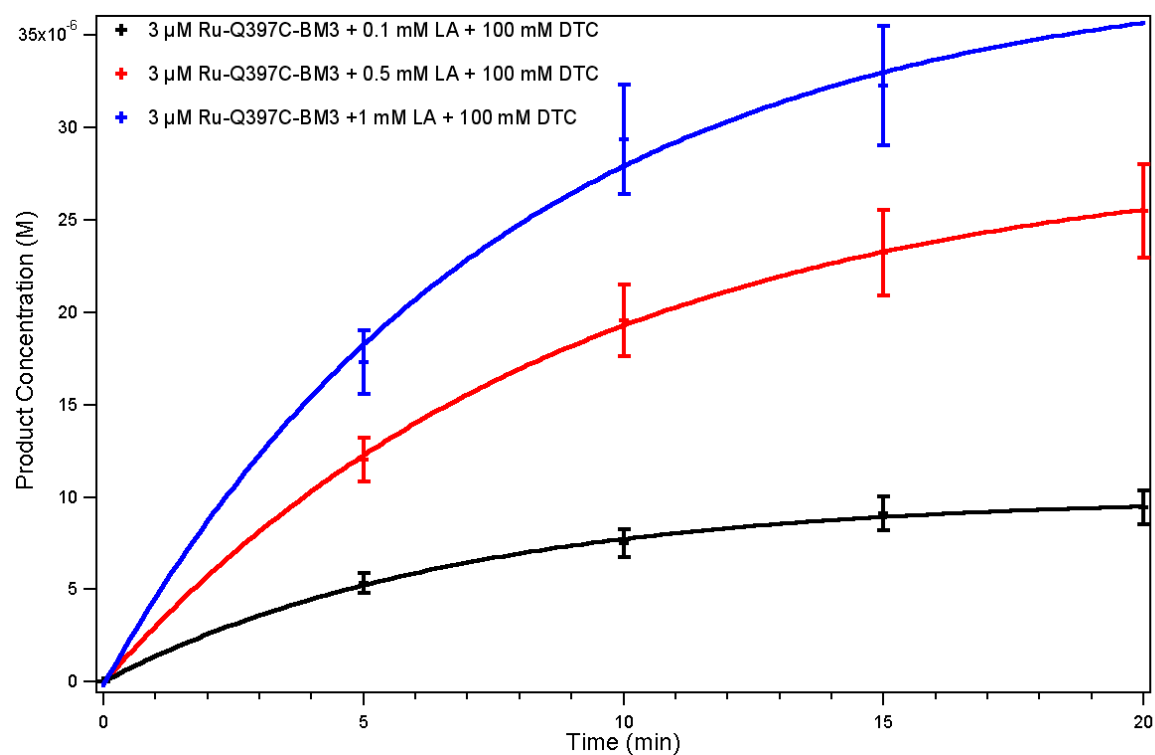

Fig. S6:

Lineweaver-Burk plot for the Ru-Q397C-BM3 and Ru-K97C-BM3 hybrid enzymes.

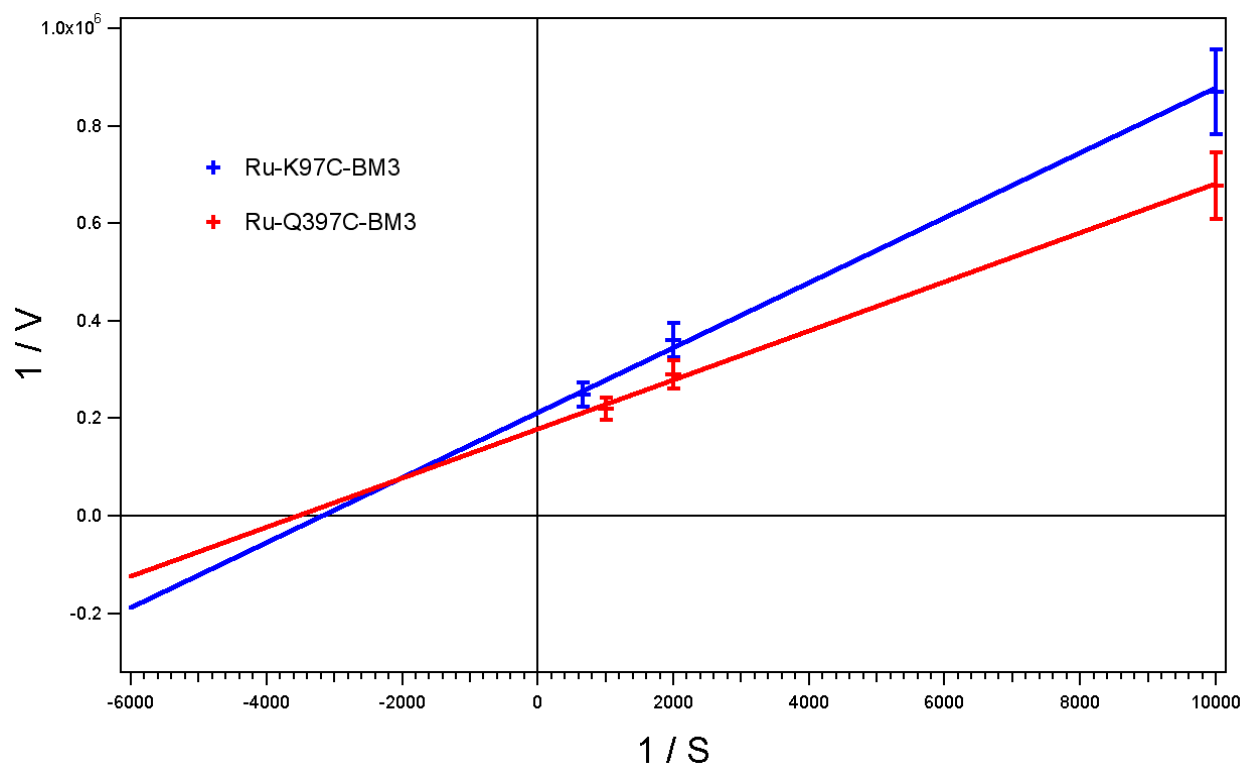

Table S1:

Initial rates of reaction for the different enzymatic systems determined in triplicates after one-minute reaction with 1.5 mM lauric acid.

| Enzymatic system                                                           | Initial reaction rate (mol product/mol enzyme/min) |
|----------------------------------------------------------------------------|----------------------------------------------------|
| 10 $\mu\text{M}$ WT + 10 mM $\text{H}_2\text{O}_2$                         | $0.68 \pm 0.05$                                    |
| 10 $\mu\text{M}$ WT + 100 $\mu\text{M}$ $\text{Ru}(\text{bpy})_3^{2+}$     | $0.11 \pm 0.05$                                    |
| 5 $\mu\text{M}$ Ru-K97C-BM3 + 100 mM DTC + hv                              | $1.41 \pm 0.13$                                    |
| 5 $\mu\text{M}$ Ru-K97C-BM3 + 100 mM DTC + hv + 10 $\mu\text{M}$ catalase  | $1.80 \pm 0.08$                                    |
| 5 $\mu\text{M}$ Ru-Q397C-BM3 + 100 mM DTC + hv                             | $1.59 \pm 0.16$                                    |
| 5 $\mu\text{M}$ Ru-Q397C-BM3 + 100 mM DTC + hv + 10 $\mu\text{M}$ catalase | $2.65 \pm 0.14$                                    |

Fig. S7:

Difference spectrum for the BM3-WT and Ru-BM3 enzymes in the presence of CO under photoreductive conditions (100 mM DTC and constant light irradiation from a mercury lamp with UV- and IR-cutoff filters).

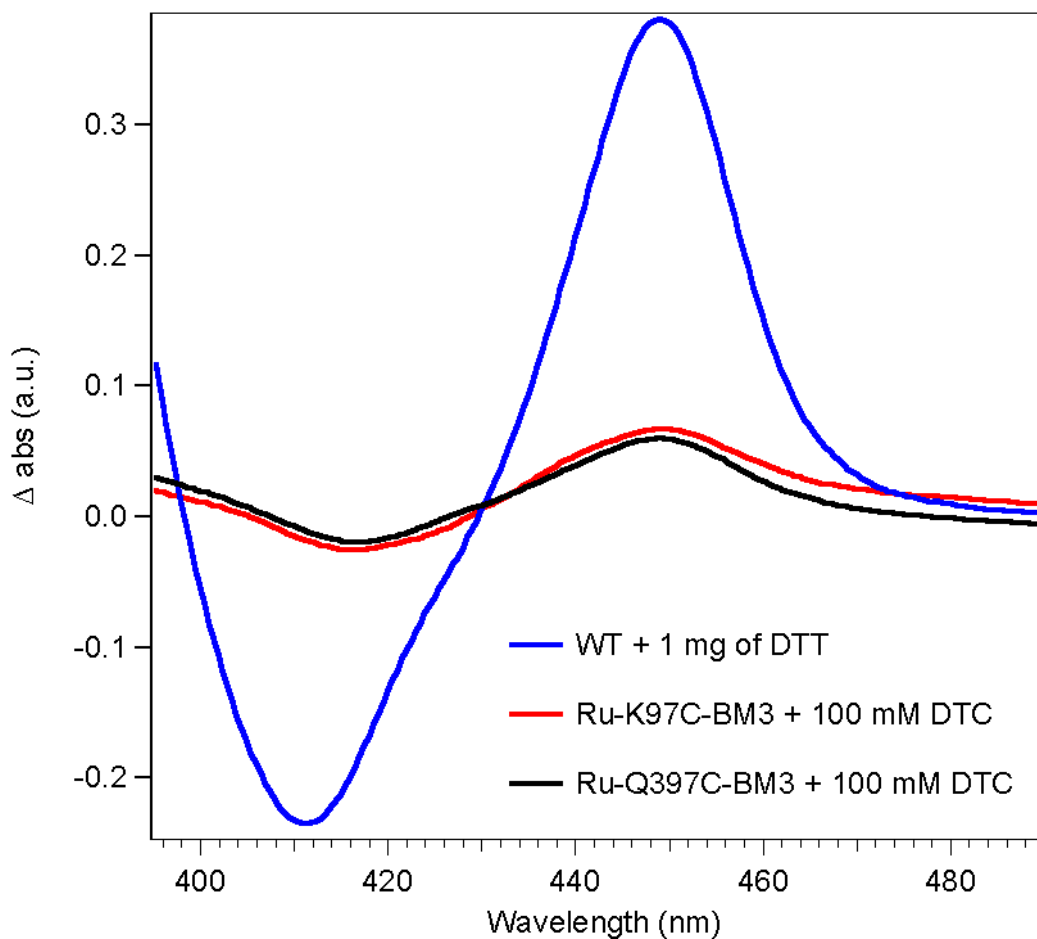

Fig. S8:

Absorption spectra showing the Ru-Q397C-BM3 protein decay over the course of the reaction (dashed lines) and with 10  $\mu\text{M}$  catalase (solid lines). Inset: Single exponential fit of the protein decay (rate =  $0.02 \text{ min}^{-1}$  with 10  $\mu\text{M}$  catalase).

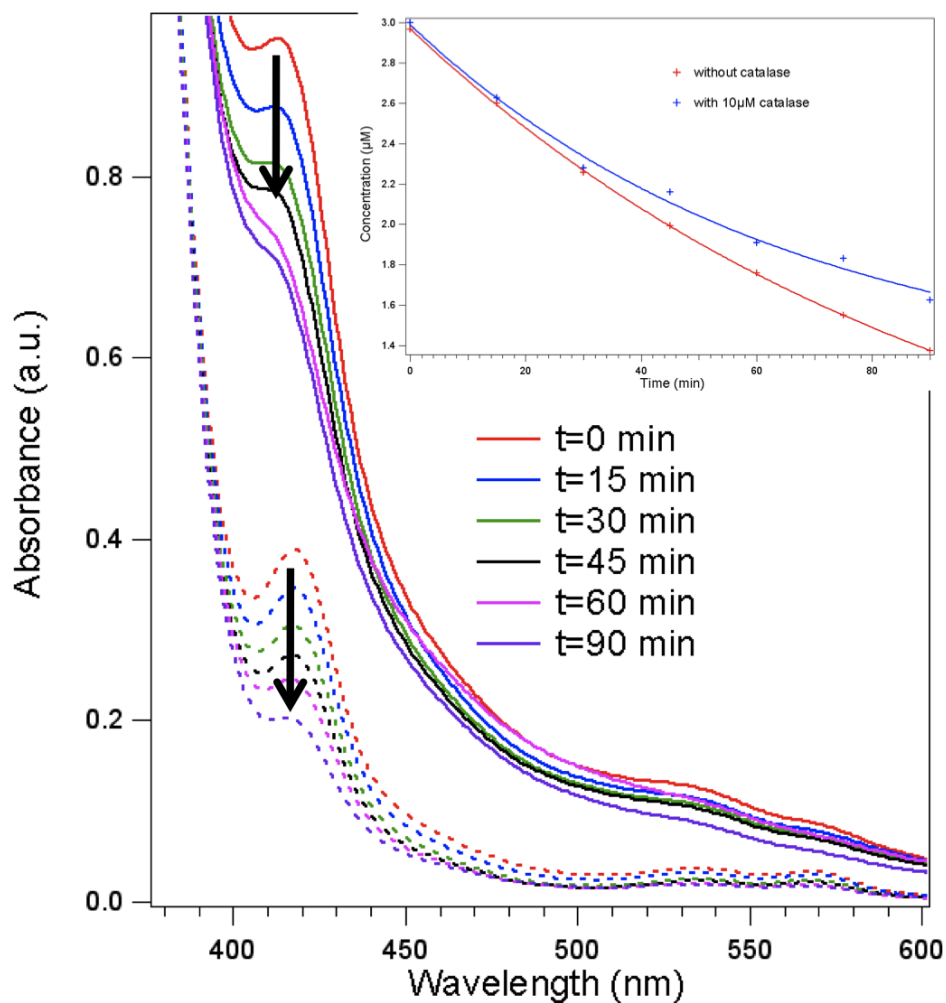

Fig. S9:

Representative curves showing formation of products over time with 3  $\mu\text{M}$  BM3-WT and 10 mM  $\text{H}_2\text{O}_2$  (black), 3  $\mu\text{M}$  Ru-Q397C-BM3 and 10 mM  $\text{H}_2\text{O}_2$  (red) and 100 mM DTC + light (blue).

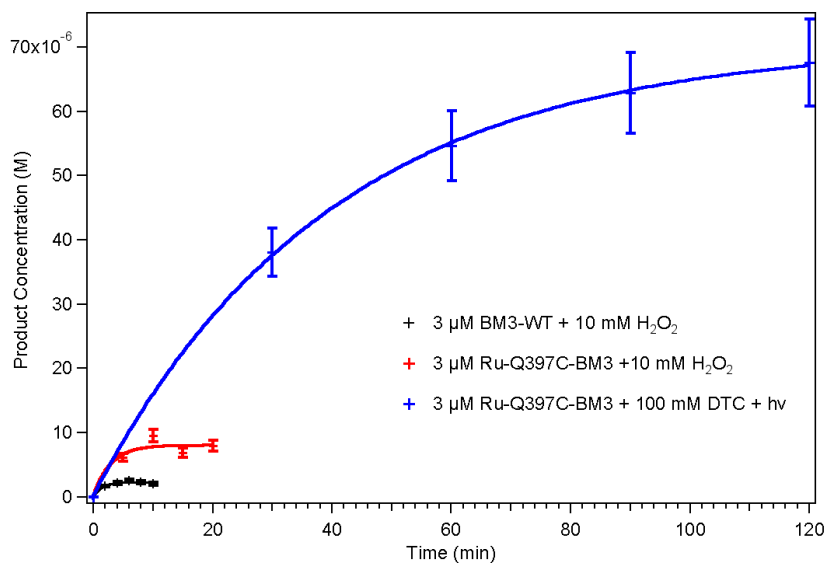

Supplement: NIHMS334471-supplement-ESI.pdf [file NIHMS334471-supplement-ESI.pdf]
